# Supplementary material for: Are Cyanobacteria an Ancestor of Chloroplasts or Just One of the Gene Donors for Plants and Algae?
Source: MDPI journal article supplement (doi:10.3390/genes12060823), 2021-05-27

## **Supplementary Materials**

### **Are Cyanobacteria an Ancestor of Chloroplasts or Just One of the Gene Donors for Plants and Algae?**

Naoki Sato

#### **Contents**

1. Methods of phylogenetic analysis
2. Description of trees
  - 2.1. RbcL
  - 2.2. RpoA
  - 2.3. PsaA
  - 2.4. PsaB
  - 2.5. Tic20
3. References

Table S1 Summary of phylogenetic analysis of PsaA/PsaB

Table S2 List of organisms used for the phylogenetic analysis of PsaA and PsaB

Figure S1 Phylogenetic trees of RbcL

Figure S2 Phylogenetic trees of RpoA

Figure S3 Phylogenetic trees of PsaA

Figure S4 Phylogenetic trees of PsaB

Figure S5 Phylogenetic trees of Tic20

## 1. Methods of phylogenetic analysis

### 1.1. Data

Sequence data were obtained from the pre-formed protein clusters of Gclust (<http://gclust.c.u-tokyo.ac.jp/>). The Gclust database consists of homolog clusters of sequenced genomes [145,146]. For the phylogenetic trees shown below, I used the dataset Cyanoclust2018 that includes 72 proteobacteria, 109 cyanobacteria, 66 other bacteria, 52 plastids and chromatophores, and 11 Archaea. Gclust clusters were prepared according to the "entropy-optimized organism count method" so that they include orthologs and very closely related homologs. Nuclear-encoded plant and algal homologs of Tic20 were obtained from the dataset Gclust2012 and added to the cyanobacterial homolog cluster. Initially, phylogenetic analysis with all homologs of all species was performed, but the phylogenetic trees presented in these supplementary materials include a limited number of species.

### 1.2. Phylogenetic analysis

Multiple alignments of the homolog sequences (amino acid sequences) were performed by the software Muscle version 3.8.31 [147]. The alignment was checked by visualizing with the software ClustalX version 2 [148]. To obtain the sites having phylogenetic signals, I used the "getclu" command of the software SISEQ [149]. Accordingly, the low-quality parts at both N- and C- termini, as well as the sites containing gaps in more than 20% sequences, were removed. This procedure normally gives reliable alignments as shown previously [93].

Initial phylogenetic analysis was performed by the software PHYLIP ("neighbor" command), and long branches were removed by visual inspection. Then, phylogenetic analysis (maximum likelihood method: ML) was performed by the software PhyML version 3 [150] (options were: -d aa -m LG -s BEST -b -5). LG model was chosen by the ProtTest 3 software version 3.4.2 [151]. This was consistent with previous results of various chloroplast proteins [77, 93]. Then, long branches and strange patterns (such as splitting off a phylum into several groups, etc) were checked, and the taxa causing problems were eliminated again. There is no objective way of this process. The effectiveness of the process was checked by repeated tree constructions.

Then, a new round of alignment and phylogenetic analysis was performed. If a reasonable tree (this is a very subjective impression, but this will be finally checked by the consistency of ML and BI trees) was obtained, phylogenetic analysis was also performed by the Bayesian Inference (BI) method. For BI trees, the software MrBayes version 3.2.7 [152] was used with the following parameters: lset rates=invgamma, prset aamodelpr=fixed(lg), prset ratepr=variable, and mcmc ngen= 20,000,000. samplefreq and burnin were appropriately set depending on the value of ngen. The burnin values were set to remove 30% of the generated trees. Various trials were performed to obtain convergence. If the trees of ML and BI are not consistent (at least for main branchings), putative problematic taxa were eliminated. This process was repeated several times to finally obtain consistent trees of ML and BI methods.

BI analysis was also performed with the software PhyloBayes version 4.1 [153] with the CAT + GTR model. This is hereafter called PB analysis. The CAT model is reportedly robust to long-branch attraction.

In the analysis of PsaA and PsaB, I noticed that taxon sampling and phylogenetic methods seriously affected the results of phylogenetic analysis. This will be explained in 2.3 and 2.4.

## 2. Description of trees

The number preceding each taxon name shows the cluster number in the Cyanoclust2018 database. Taxa are marked with cyanobacterial clade names (Fig. 3A in the main text) according to [53,54]. In many trees, a combination of numbers on each major branch indicates branch support values (a posterior probability of BI / a confidence value of ML). For simplicity, support values are not shown for minor branches. "1.00" was shown as "1" for short. Because *Halomicronema* was not included in the previous papers [53,54], it was not easy to determine which cyanobacterial clade it belongs to. *Halomicronema* is related to *Prochlorothrix* in the C2 clade. But the actual phylogenetic data (Fig. S1, S2, and S5) showed its association to *Acaryochloris* in the E clade. The two copies of PsaA and PsaB in *Halomicronea* are diverse, and it is difficult to say which of them is the native copy. *Halomicronema* was not used in the discussions on clade association.

### 2.1. RbcL

Figure S1 shows phylogenetic trees of RbcL with different sets of taxa.

(A) BI tree (57 taxa, 471 sites) of RbcL with ML confidence values.

The phylogenetic tree of RbcL is a complex tree composed of different clades known as "forms". The chloroplast clade of green plants/algae plus glaucophytes is sister to a large clade of cyanobacteria (clades B1, C2, C3, E, and O) having  $\beta$ -carboxysomes (Form IB), which also contain *Gloeobacter* in the middle that is normally located at the root of all cyanobacteria. Note that *G. lithophora* RbcL was not sister to the green chloroplast RbcL. The root of Form IB is the Yellowstone cyanobacterium (clade G), which is another basal cyanobacterium. Many horizontal gene transfers were identified in rubisco [100]. The chloroplast clade of red algae (Form ID) has been known to originate from  $\alpha$ -proteobacteria (Form IC). The marine species of cyanobacteria (clade C1) that contain  $\alpha$ -carboxysomes have been known to acquire rubisco (Form IA) from bacteria containing  $\alpha$ -carboxysomes. This tree almost correctly reconstructs the known relationships of various forms of rubisco reported in the literature [99,100], although very long branches are included. Removal of some long branches causes deformation of trees, suggesting a balance of various long branches.

(B) ML tree and (C) PB tree of RbcL (37 taxa, 475 sites).

In these trees, two sequences of bacteria containing  $\alpha$ -carboxysomes (Form IA) are taken as an outgroup. Form IA RbcL sequences of the clade C1 cyanobacteria were not included to avoid long branches. The chloroplast clade diverged from a large clade consisting of the clades, B1, C2, C3, E, A, F and O in both

trees.

(D) BI/ML tree and (E) PB tree of RbcL (35 taxa, 474 sites).

In these trees, Form IA sequences were no longer included, and rooted with the clade G. The chloroplast clade diverged from the cyanobacterial clades, B1, C2, C3, E, and O in the BI/ML tree, whereas clades A and F were also associated as unresolved taxa in the PB tree.

The cyanobacterial RbcL seemed to be affected by complex gene transfers, and the origin of the chloroplast RbcL was difficult to assign, but all these results were consistent and suggested that the chloroplast clade (green algae/plants plus glaucophytes) diverged from the B1 and C2 clades rather than from B2 or basal clades (G and H).

## 2.2. *RpoA*

RpoA is a subunit of prokaryotic RNA polymerase encoded by the chloroplast genome. Figure S2 shows phylogenetic trees of RpoA with different taxa.

(A) BI tree of RpoA (52 taxa, 310 sites) with ML confidence values.

The chloroplast clade was sister to *G. lithophora*. These diverged from a clade consisting of the A, B1, and B2 clades. The association of *G. lithophora* to the chloroplasts is reminiscent to the situation in the rRNA tree [54], in which both diverged from the deep root of cyanobacteria. However, the RpoA tree is different from the rRNA tree.

(B) BI/ML tree and (C) PB tree of RpoA (43 taxa, 306 sites).

In both trees, the chloroplast clade plus *G. lithophora* diverged from the cyanobacterial clade consisting of A, B1, and B2. All these trees are consistent with each other, and confirm the origin of chloroplast RpoA within the A, B1, and B2 clades. The position of *G. lithophora* is exceptional.

## 2.3. *PsaA*

PsaA and PsaB are the central subunits of the Photosystem I, and they are homologous to each other.

Figure S3 shows phylogenetic trees of PsaA with different taxa obtained by different methods.

(A) ML tree, (B) BI tree, and (C) PB tree of PsaA (33 taxa, 751 sites).

(D) ML tree, (E) BI tree, and (C) PB tree of PsaA (32 taxa, 751 sites).

Phylogenetic analysis of PsaA (and PsaB) is extremely difficult, because taxon sampling and phylogenetic methods affect seriously the resultant trees. Table S1 summarizes the results of analysis. I used four major different taxon sets with or without *G. lithophora*. The list of actual set of taxa in each analysis is shown in Table S2. Some cyanobacteria such as *Calothrix* sp. PCC 7507, *Chroococcidiopsis thermalis* PCC 7203, and *Halomicronema hongdechloris* C2206 contained, respectively, two, two, and three sets of *psaA-psaB* operons. Some other cyanobacteria, such as *Nostoc* sp. PCC 7120 and *Leptolyngbya* sp. NIES 3755 contain additional single copies of *psaB*. To minimize complications, only two sets of PsaA and PsaB were used for *Halomicronema hongdechloris* C2206, and additional single copies were removed. The resulting 48 taxa

were used in the analysis "A4 and B4" (Table S1). In this section, only results of PsaA are described. The chloroplast clade diverged from the clade consisting of B1, B2, C3 and E, which is different from the previously reported results [105]. However, removing *G. lithophora* drastically changed the tree (set A4-2), and the clades C1 and C2 were sister to the chloroplast clade. Since this discrepancy could result from long-branch attraction, long branches such as land plants, *Chlamydomonas*, *Cyanidium*, *Prochlorococcus*, and *Acaryochloris* were removed (set A4e). The resulting ML and BI trees (Fig. S3A and B) were still similar to the corresponding trees in the set A4. The PB tree of the set A4e (Fig. S3C) showed that the clades C1, C2, and H were sister to the chloroplast clade. The PB tree did not change after removal of *G. lithophora* (set A4e2: Fig. S3F). Curiously, the PB trees were similar to the ML and BI trees (Fig. S3D and E) of the set A4e2 (without *G. lithophora*). However, addition of some land plant taxa (set A4f) led to discrepancy between the ML/BI trees and the PB tree. Further removal of many chloroplast taxa (set A4g) also changed the PB tree. The set A4g2 without *G. lithophora* presented consistent results with ML, BI, and PB methods, except for the position of the clade A. These results suggest that *G. lithophora* has a strange effect on the tree form. After removal of long branches, and without *G. lithophora*, all three methods gave approximately consistent results (sets A4e2 and A4g2), suggesting that the chloroplast clade diverged from the common ancestor of the cyanobacterial clades, C1, C2, and H (plus A?).

#### 2.4. PsaB

Figure S4 shows phylogenetic trees of PsaB with different taxa obtained by different methods.

(A) BI/ML tree, and (B) PB tree of PsaB (33 taxa, 733 sites).

(C) ML tree, (D) BI tree, and (E) PB tree of PsaB (32 taxa, 733 sites).

The phylogenetic analysis of PsaB was again very difficult: different taxon sampling with different methods gave inconsistent results (Table S1). However, the set B4e2 (33 taxa without *G. lithophora*) gave compatible results with the three methods, as in the case of the set A4e2 of PsaA. The PB analysis often associated *Pseudanabaena* to the chloroplast clade in both PsaA and PsaB, but this must be an artifact. In contrast to PsaA, the presence of *G. lithophora* changed the morphology of PB trees (Fig. S4B and E), although the branch support of the chloroplast clade with the B1+A+E+F clade in Fig. S4B was low (0.32). The B1 (+A+E+F) clade was also the closest to the combined chloroplast and C1+C2 clade in the ML analysis (Fig. S4C). In any case, the analysis of the set B4e or B4e2 showed that the clade C1+C2 was the closest to the chloroplast clade. This is also consistent with the results of PsaA.

The concatenated PsaA and PsaB sequences were also analyzed (Table S1). Consistent results were obtained by the PB analysis with both AB7c and AB7d datasets, although the branching was not completely resolved in the latter. The sister relationship between the clade C1+C2 and the chloroplast clade was also supported by the ML analysis of the set AB7c and by the BI analysis of the set AB7d.

In all analyses of PsaA and PsaB, the two clades B1 and B2 were not associated as in the canonical trees of cyanobacteria reported previously [53,54]. The split of B1 and B2 was also found in the

RbcL analysis (section 2.1). Horizontal gene transfers must be more often within the cyanobacterial genomes than we unconsciously presume.

### 2.5. *Tic20*

Figure S5 shows phylogenetic trees of *Tic20* with different taxa by different methods.

(A) BI tree of *Tic 20/Ycf60* with ML confidence values (70 taxa, 155 sites).

(B) BI/ML tree of *Tic20/Ycf60* (41 taxa, 158 sites).

(C) BI/ML tree of *Tic20* (32 taxa, 158 sites).

The chloroplast clade is duplicated, and one of them (*Ycf60*) is encoded by the chloroplast genome in red algae. All other plant/algal *Tic20* homologs are encoded by the nuclear genome. Archaeal homologs of red algal *Ycf60* were also found. The chloroplast clade was sister to the C1 clade in all phylogenetic trees. Note that PB analysis was also attempted, but the results did not converge probably because of the small size of the protein.

## 3. References added in supplementary materials

145. Sato, N. Gclust: *trans*-kingdom classification of proteins using automatic individual threshold setting. *Bioinformatics* **2009**, 25, 599–605. doi: 10.1093/bioinformatics/btp047.
146. Sato, N.; Obayashi, T. Lipid pathway databases with a focus on algae. In *Methods in Molecular Biology: Plant Lipids*, vol. 2295; Bartels, D.; Dörmann, P. Eds.; Springer Science: **2021**. (in press). doi: 10.1007/978-1-0716-1362-7\_26.
147. Edgar, R. C. MUSCLE: multiple sequence alignment with high accuracy and high throughput. *Nucleic Acids Res.* **2004**, 32, 1792–1797. doi: 10.1093/nar/gkh340.
148. Larkin, M. A.; Blackshields, G.; Brown, N. P.; Chenna, R.; McGettigan, P. A.; McWilliam, H.; Valentin, F.; Wallace, I. M.; Wilm, A.; Lopez, R.; Thompson, J. D.; Gibson, T. J.; Higgins, D. G. Clustal W and Clustal X version 2.0. *Bioinformatics* **2007**, 23, 2947–2948. doi: 10.1093/bioinformatics/btm404.
149. Sato, N. SISEQ: Manipulation of multiple sequence and large database files for common platforms. *Bioinformatics* **2000**, 16, 180–181. doi: 10.1093/bioinformatics/16.2.180.
150. Guindon, S.; Dufayard, J. F.; Lefort, V.; Anisimova, M.; Hordijk, W.; Gascuel, O. New algorithms and methods to estimate maximum-likelihood phylogenies: assessing the performance of PhyML 3.0. *Syst. Biol.* **2010**, 59, 307–321. doi: 10.1093/sysbio/syq010.
151. Darriba, D.; Taboada, G. L.; Doallo, R.; Posada, D. ProtTest 3: fast selection of best-fit models of protein evolution. *Bioinformatics.* **2011**, 27, 1164–1165. doi: 10.1093/bioinformatics/btr088.
152. Ronquist, F.; Teslenko, M.; van der Mark, P.; Ayres, D. L.; Darling, A.; Höhna, S.; Larget, B.; Liu, L.; Suchard, M. A.; Huelsenbeck, J. P. MrBayes 3.2: efficient Bayesian phylogenetic inference and model

- choice across a large model space. *Syst. Biol.* **2012**, 61, 539–42. doi: 10.1093/sysbio/sys029.
153. Lartillot, N; Philippe, H. A Bayesian mixture model for across-site heterogeneities in the amino-acid replacement process. *Mol. Biol. Evol.* **2004**, 21, 1095–1109. doi: 10.1093/molbev/msh112.

**Table S1 Summary of phylogenetic analysis of PsaA/PsaB**

The closest sister clade to the plastid clade is shown. If available, the second and third closest clades are shown after slashes. Unresolved branches are shown with a comma. Glli, *Gloeomargarita lithophora* (clade H).

| No.    | Taxa    | PhyML<br>(LG)                    | MrBayes<br>(LG)           | PhyloBayes<br>(CAT,GTR)    |
|--------|---------|----------------------------------|---------------------------|----------------------------|
| PsaA   |         |                                  |                           |                            |
| A4     | 48      | (((B1,E),C3),B2)                 | (((B1,E),C3),B2)          | Not analyzed               |
| A4-2   | 48-Glli | (C1,C2)                          | (C1,C2)                   | Not analyzed               |
| A4e    | 33      | (((B1,C3),E),B2)                 | (((B1,C3),E),B2)          | <b>((C1,C2),H)</b>         |
| A4e2   | 33-Glli | <b>(C1,C2)</b> / A / B2          | <b>A / (C1,C2)</b> / B2   | <b>(C1,C2)</b>             |
| A4f    | 40      | (((B1,C3),A),B2)                 | (((B1,C3),A),B2)          | ((A,F),B2), ((C1,C2),H)    |
| A4g    | 24      | (((B1,C3),E),B2)                 | (((B1,C3),E),B2)          | ((A,F),B2)                 |
| A4g2   | 24-Glli | A / (C1,C2) / B2                 | A / (C1,C2) / B2          | (C1,C2)                    |
|        |         |                                  |                           |                            |
| PsaB   |         |                                  |                           |                            |
| B4     | 48      | (C1,C2)                          | (C1,C2)                   | Not analyzed               |
| B4-2   | 48-Glli | (C1,C2)                          | (C1,C2)                   | Not analyzed               |
| B4e    | 33      | <b>(C1,C2)</b> / B2              | <b>(C1,C2)</b> / B2       | H / (((B1,(A,E)),F)        |
| B4e2   | 33-Glli | <b>(C1,C2)</b> / (((B1,(A,E)),F) | <b>(C1,C2)</b> / B2       | <b>(C1,C2)</b> / B2        |
| B4f    | 40      | (C1,C2) / B2                     | (C1,C2) / B2              | H, F / ((A,B1),E)          |
| B4g    | 24      | H / (others unresolved)          | H / (others unresolved)   | H, F / (B1,(A,E))          |
| B4g2   | 24-Glli | (C1,C2) / B2                     | (C1,C2) / B2              | F / ((B1,E),A)             |
|        |         |                                  |                           |                            |
| PsaA+B |         |                                  |                           |                            |
| AB7c   | 45      | <b>(C1,C2)</b> / B2              | ((B1,E),A)                | <b>(C1,C2)</b> , (F,H), B2 |
| AB7d   | 33      | (((B1,E),A),C3)                  | <b>(C1,C2)</b> / B2, H, F | <b>(C1,C2)</b> / (F,H), B2 |



**Table S2 List of organisms used for the phylogenetic analysis of PsaA and PsaB**

| Organism                                          | Phylum/Clade          | 4  | 4e | 4f | 4g | 7c | 7d |
|---------------------------------------------------|-----------------------|----|----|----|----|----|----|
| << Chloroplasts >>                                |                       |    |    |    |    |    |    |
| <i>Arabidopsis thaliana</i> Cp                    | Angiosperms           | +  |    |    |    | +  |    |
| <i>Nicotiana tabacum</i> (tobacco) Cp             | Angiosperms           | +  |    |    |    | +  |    |
| <i>Zea mays</i> B73 Cp                            | Angiosperms           | +  |    |    |    | +  |    |
| <i>Oryza sativa</i> Cp                            | Angiosperms           | +  |    |    |    | +  |    |
| <i>Amborella trichopoda</i> Cp                    | Angiosperms           | +  |    |    |    | +  |    |
| <i>Pinus thunbergii</i> (pine) Cp                 | Gymnosperms           | +  |    | +  |    | +  |    |
| <i>Adiantum capillus-veneris</i> Cp               | Pteridophytes         | +  |    | +  |    | +  |    |
| <i>Anthoceros formosae</i> Cp                     | Bryophytes            | +  |    | +  |    | +  |    |
| <i>Marchantia polymorpha</i> Cp                   | Bryophytes            | +  |    | +  |    | +  |    |
| <i>Physcomitrella patens</i> Cp                   | Bryophytes            | +  |    | +  |    | +  |    |
| <i>Klebsormidium nitens</i> (flaccidum) Cp        | Charophytes           | +  |    | +  |    | +  |    |
| <i>Mesostigma viride</i> Cp                       | Streptophytes         | +  | +  | +  |    | +  | +  |
| <i>Micromonas commoda</i> RCC299 Cp               | Green algae           | +  | +  | +  |    | +  | +  |
| <i>Ostreococcus tauri</i> Cp                      | Green algae           | +  | +  | +  |    | +  | +  |
| <i>Nephroselmis olivacea</i> Cp                   | Green algae           | +  | +  | +  | +  | +  | +  |
| <i>Chlamydomonas reinhardtii</i> Cp               | Green algae           | +  |    | +  |    | +  | +  |
| <i>Chlorella vulgaris</i> Cp                      | Green algae           | +  | +  | +  |    | +  | +  |
| <i>Cyanidium caldarium</i> Cp                     | Red algae             | +  |    | +  |    | +  |    |
| <i>Cyanidioschyzon merolae</i> Cp                 | Red algae             | +  | +  | +  |    | +  | +  |
| <i>Galdieria sulphuraria</i> Cp                   | Red algae             | +  | +  | +  |    | +  | +  |
| <i>Porphyridium purpurea</i> Cp                   | Red algae             | +  | +  | +  | +  | +  | +  |
| <i>Pyropia yezoensis</i> Cp                       | Red algae             | +  | +  | +  |    | +  | +  |
| <i>Chondrus crispus</i> Cp                        | Red algae             | +  | +  | +  |    | +  | +  |
| <i>Gracilaria salicornia</i> Cp                   | Red algae             | +  | +  | +  |    | +  | +  |
| <i>Cyanophora paradoxa</i> Cp                     | Glaucophytes          | +  | +  | +  | +  | +  | +  |
| << Cyanobacteria >>                               |                       |    |    |    |    |    |    |
| <i>Trichodesmium erythraeum</i> IMS101            | Clade A               | +  | +  | +  | +  | +  | +  |
| <i>Calothrix</i> sp. PCC 7507 copy1               | Clade B1              | +  | +  | +  | +  | +  | +  |
| <i>Calothrix</i> sp. PCC 7507 copy2               | Clade B1              | +  | +  | +  | +  | +  | +  |
| <i>Chroococcidiopsis thermalis</i> PCC 7203 copy1 | Clade B1              | +  | +  | +  | +  | +  | +  |
| <i>Chroococcidiopsis thermalis</i> PCC 7203 copy2 | Clade B1              | +  | +  | +  | +  | +  | +  |
| <i>Nostoc</i> sp. PCC 7120                        | Clade B1              | +  | +  | +  | +  | +  | +  |
| <i>Cyanobacterium aponinum</i> PCC 10605          | Clade B2              | +  | +  | +  | +  | +  | +  |
| <i>Cyanothece</i> sp. PCC 8801                    | Clade B2              | +  | +  | +  | +  | +  | +  |
| <i>Microcystis aeruginosa</i> NIES 843            | Clade B2              | +  | +  | +  | +  | +  | +  |
| <i>Synechocystis</i> sp. PCC 6803                 | Clade B2              | +  | +  | +  | +  | +  | +  |
| <i>Prochlorococcus marinus</i> CCMP1375           | Clade C1              | +  |    |    |    |    |    |
| <i>Synechococcus</i> sp. WH 8102                  | Clade C1              | +  | +  | +  | +  | +  | +  |
| <i>Paulinella</i> sp. DL 2016a chromatophore      | Rhizopods<br>Clade C1 | +  | +  | +  | +  | +  | +  |
| <i>Synechococcus elongatus</i> PCC 7942           | Clade C2              | +  | +  | +  | +  | +  | +  |
| <i>Halomicronema hongdechloris</i> C2206 copy1    | Clade C2,E?           | +  | +  |    | +  |    |    |
| <i>Halomicronema hongdechloris</i> C2206 copy2    | Clade C2,E?           | +  | +  | +  | +  | +  | +  |
| <i>Leptolyngbya</i> sp. NIES 3755                 | Clade C3              | +  | +  | +  | +  | +  | +  |
| <i>Thermosynechococcus elongatus</i> BP1          | Clade E               | +  | +  | +  | +  | +  | +  |
| <i>Acaryochloris marina</i> MBIC11017             | Clade E               | +  |    |    |    |    |    |
| <i>Pseudanabaena</i> sp. ABRG5_3                  | Clade F               | +  | +  | +  | +  | +  | +  |
| <i>Synechococcus</i> p. JA-3 3Ab                  | Clade G               | +  | +  | +  | +  | +  | +  |
| <i>Gloeomargarita lithophora</i> Alchichica D10   | Clade H               | +  | +  | +  | +  | +  | +  |
| <i>Gloeobacter violaceus</i> PCC 7421             | Clade O               | +  | +  | +  | +  | +  | +  |
| Total taxa                                        |                       | 48 | 33 | 40 | 24 | 45 | 33 |

Fig. S1 (Part 1)  
A. BI tree of RbcL (57 taxa)  
BI/ML (LG)

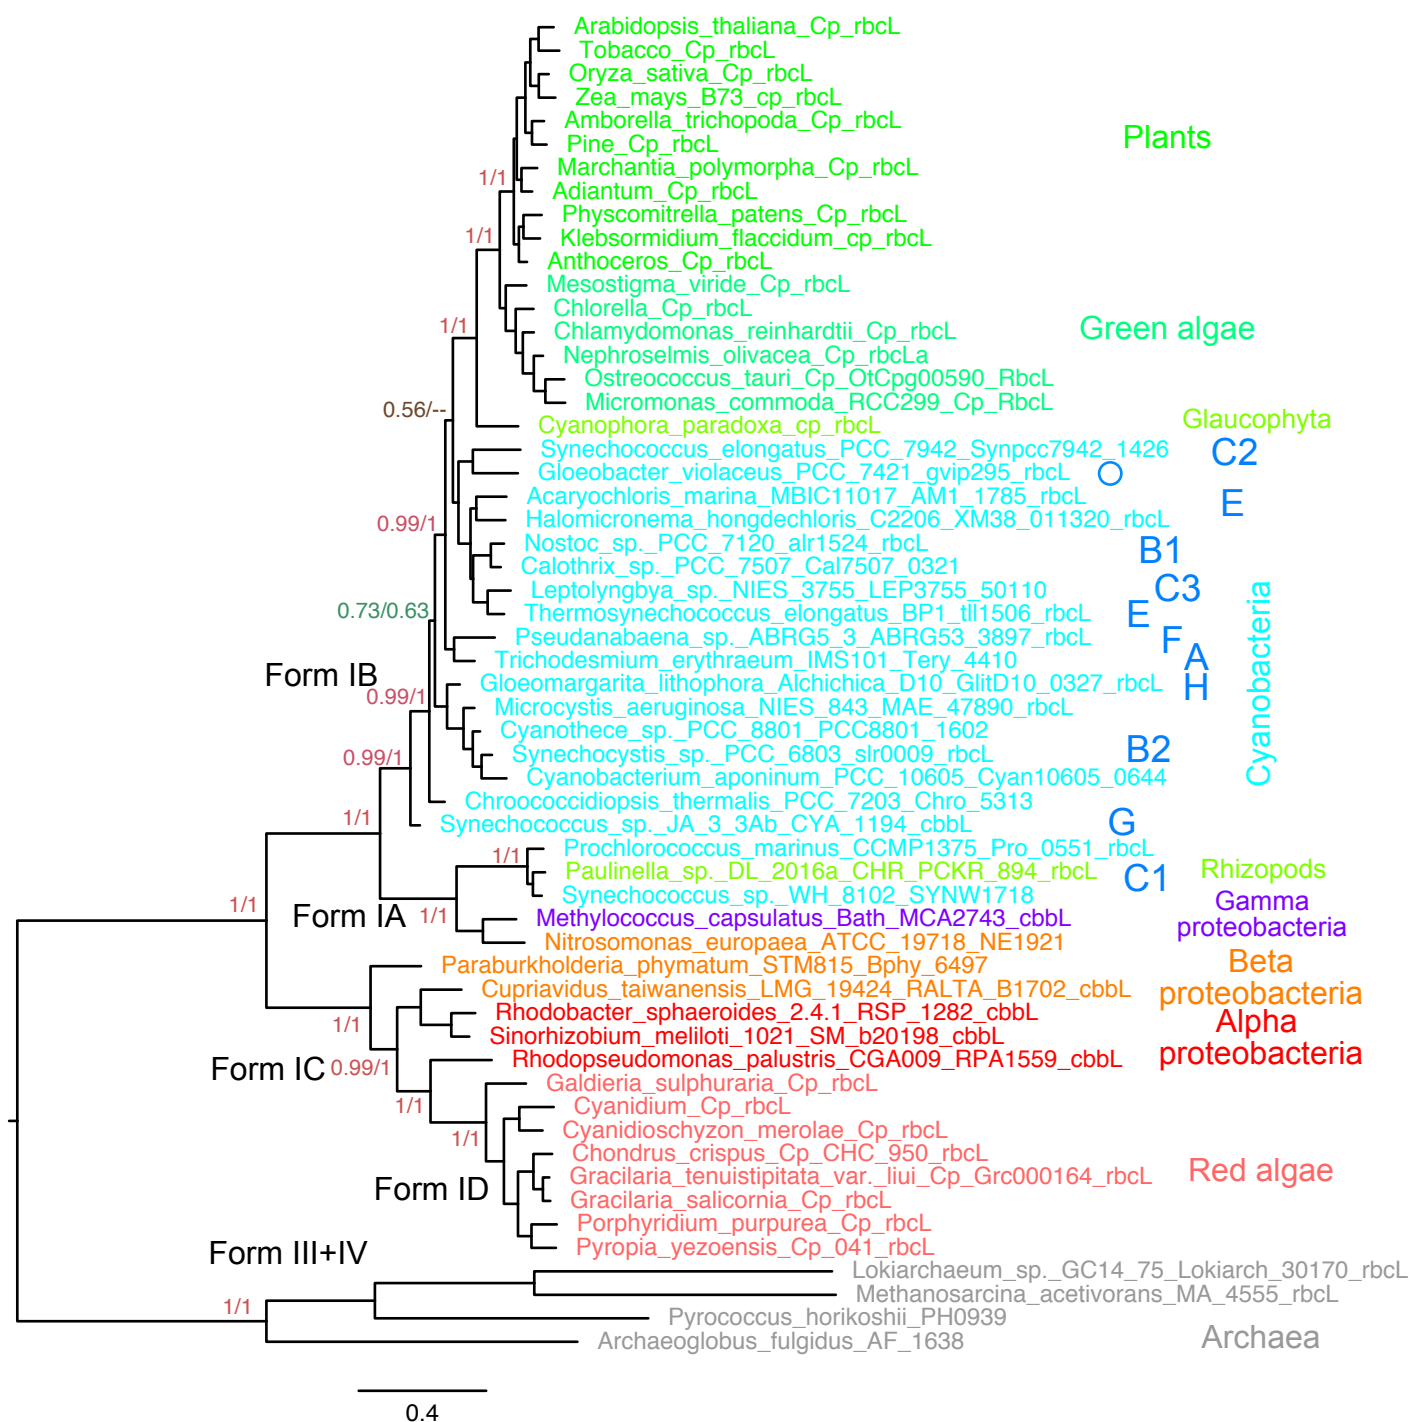

Fig. S1 (Part 2)

B. RbcL Form IA+B (37 taxa)  
ML (LG)

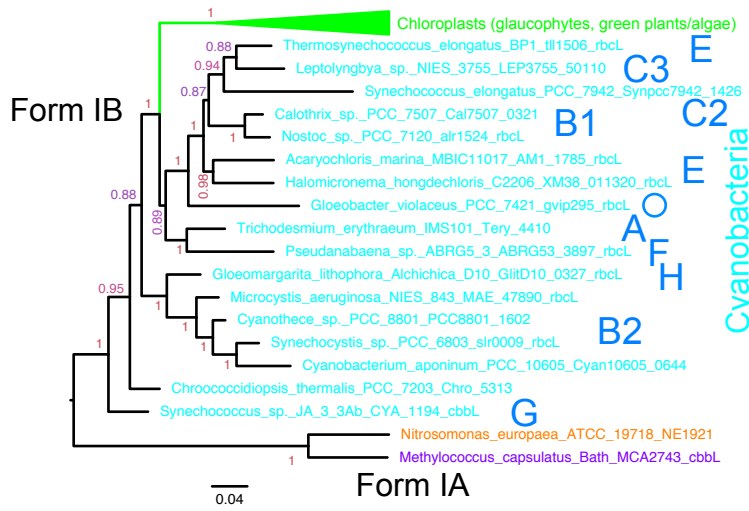

C. RbcL Form IA+B (37 taxa)  
PB (CAT-GTR)

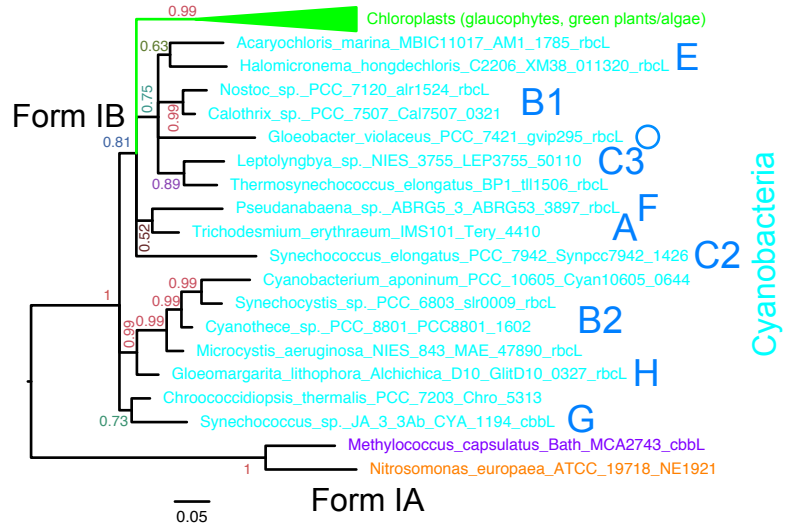

D. RbcL Form IB (35 taxa)  
BI/ML (LG)

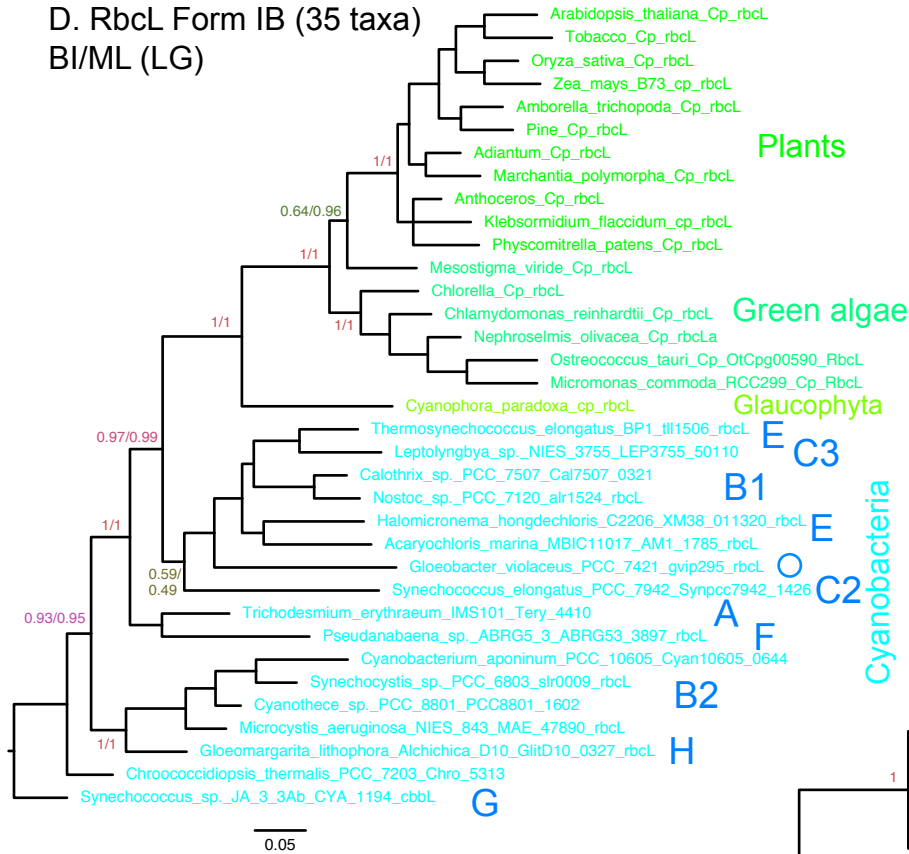

E. RbcL Form IB (35 taxa)  
PB (CAT-GTR)

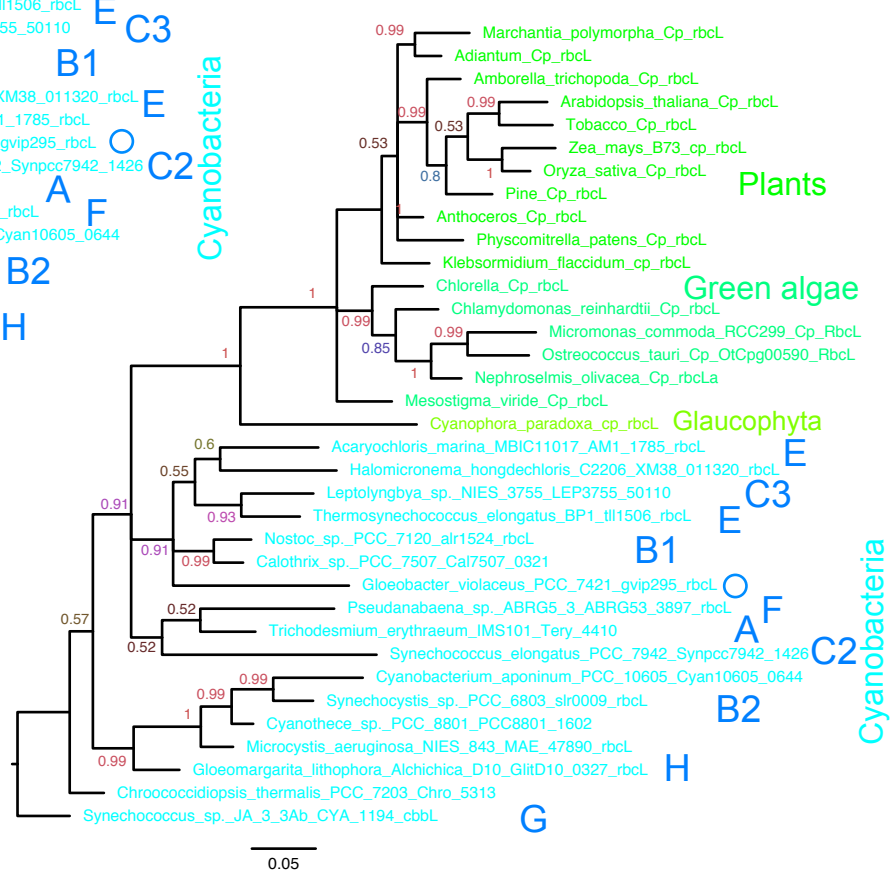

Fig. S2 (Part 1)

A. RpoA (52 taxa)

BI/ML (LG)

With bacteria

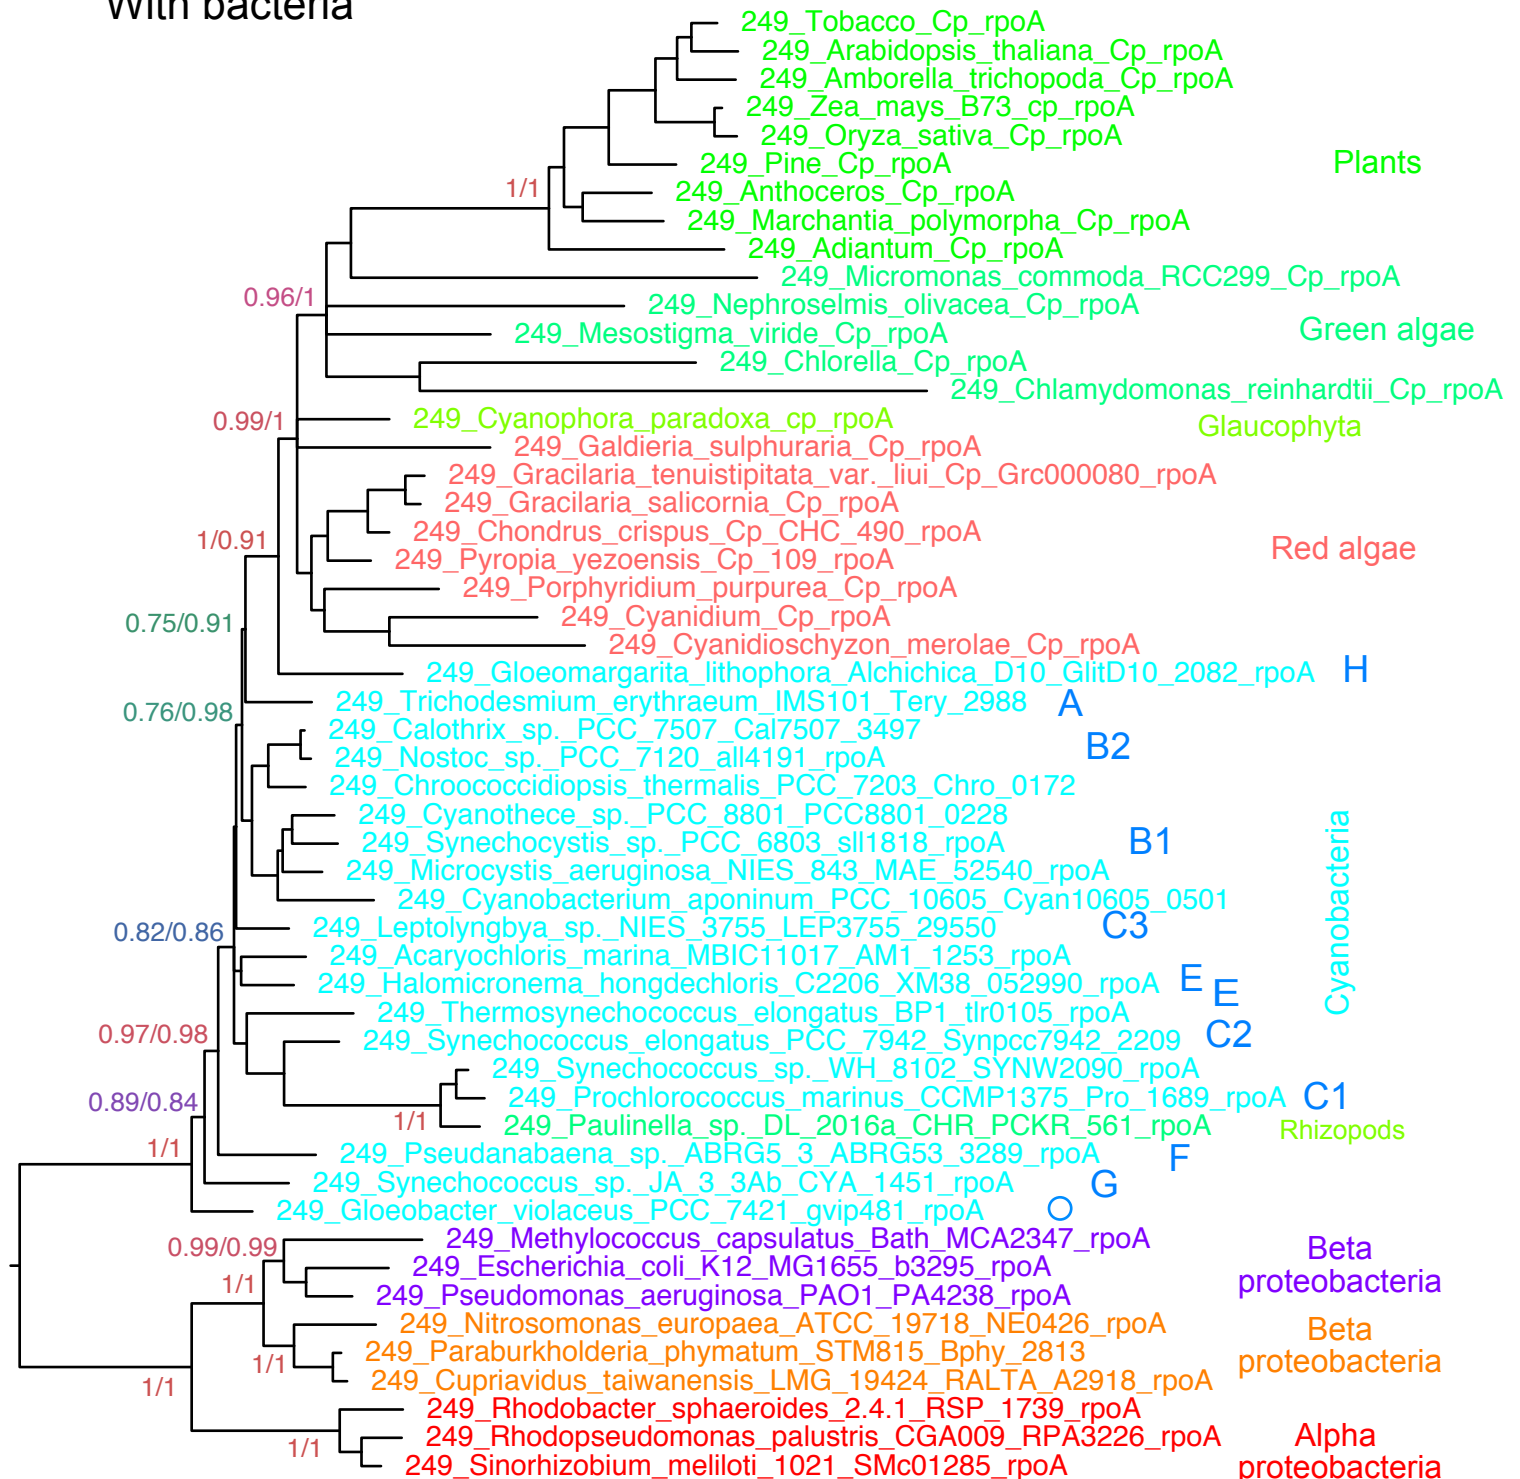

0.3

Fig. S2 (Part 2)

B. RpoA (43 taxa)  
BI/ML (LG)  
without bacteria

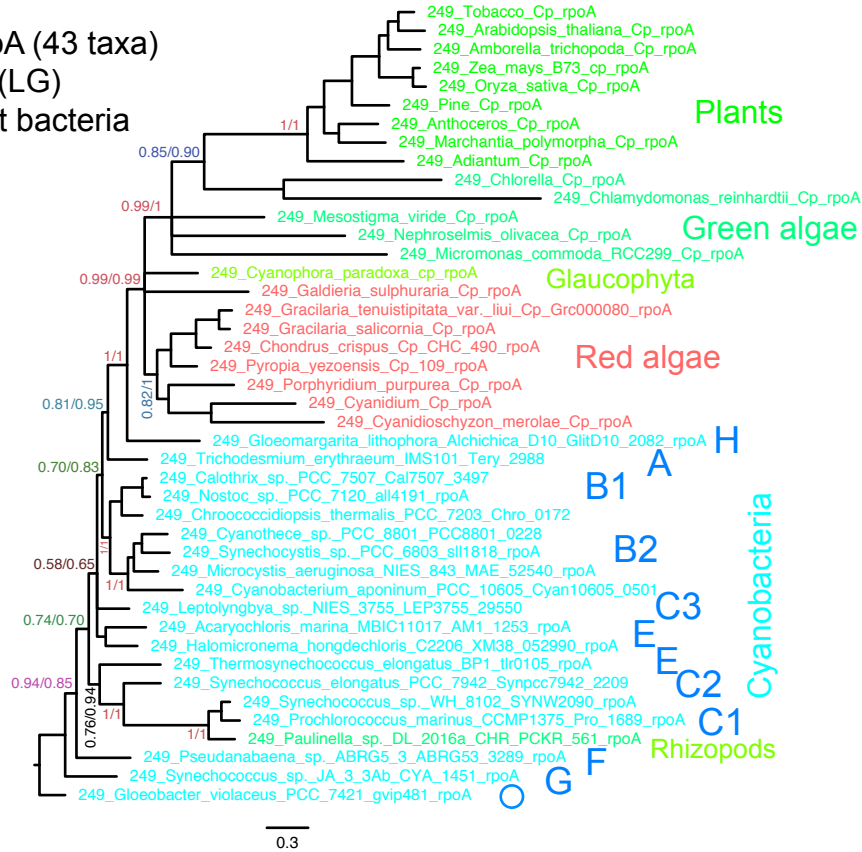

C. RpoA (43 taxa)  
PB (CAT-GTR)  
without bacteria

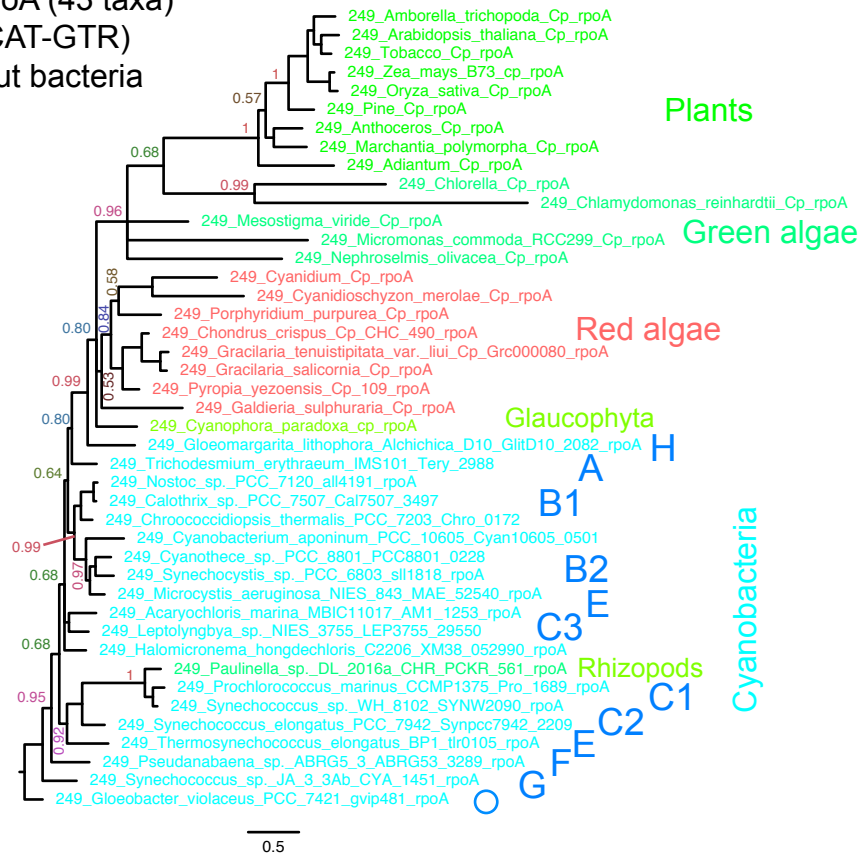

A. ML tree

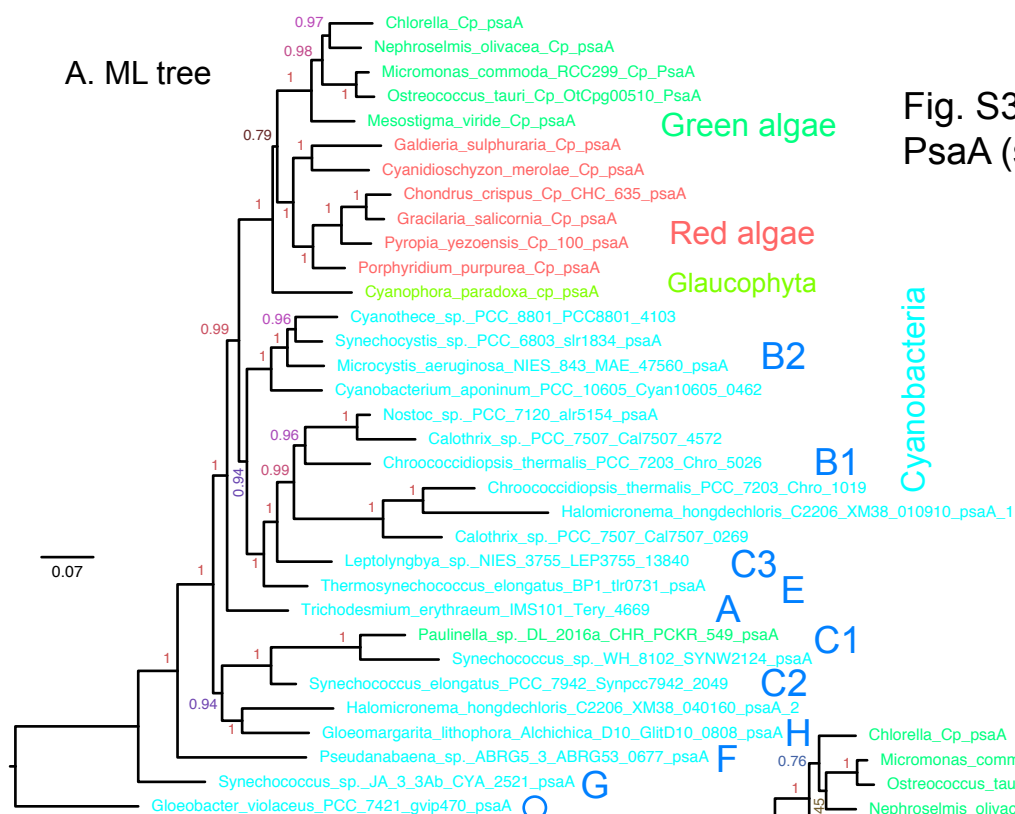Fig. S3 (part 1)  
PsaA (set 4e: 33 taxa)

B. BI tree

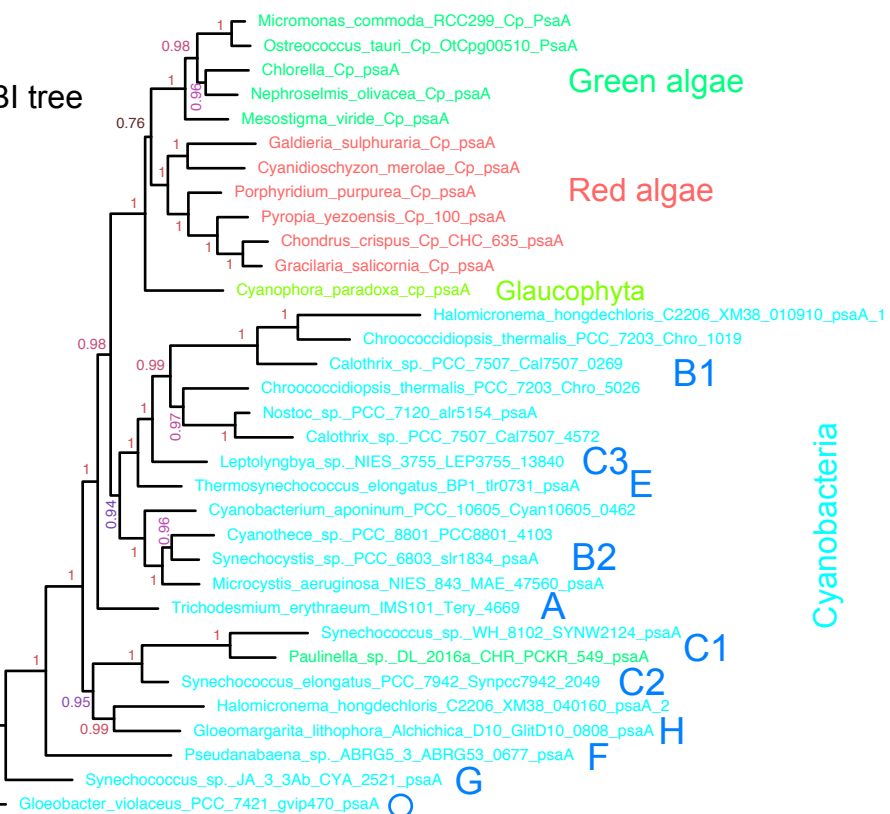

C. PB tree

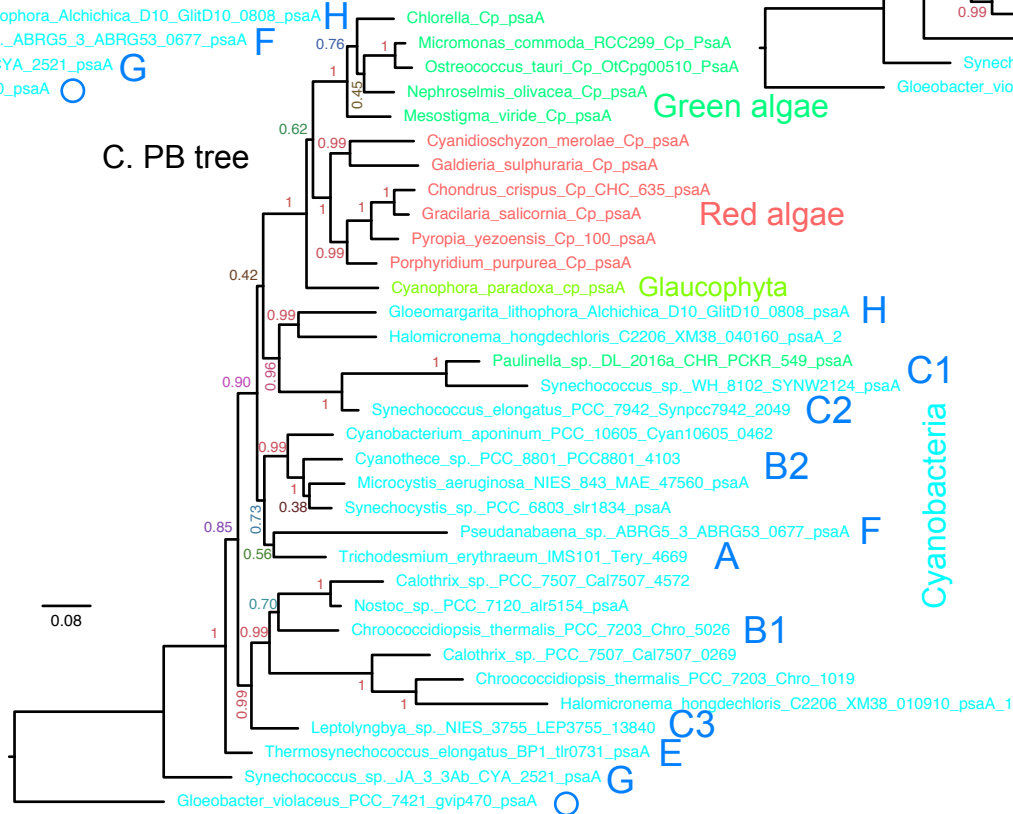



Fig. S4 (Part 1)  
PsaB (set 4e: 33 taxa)

A. BI/ML tree

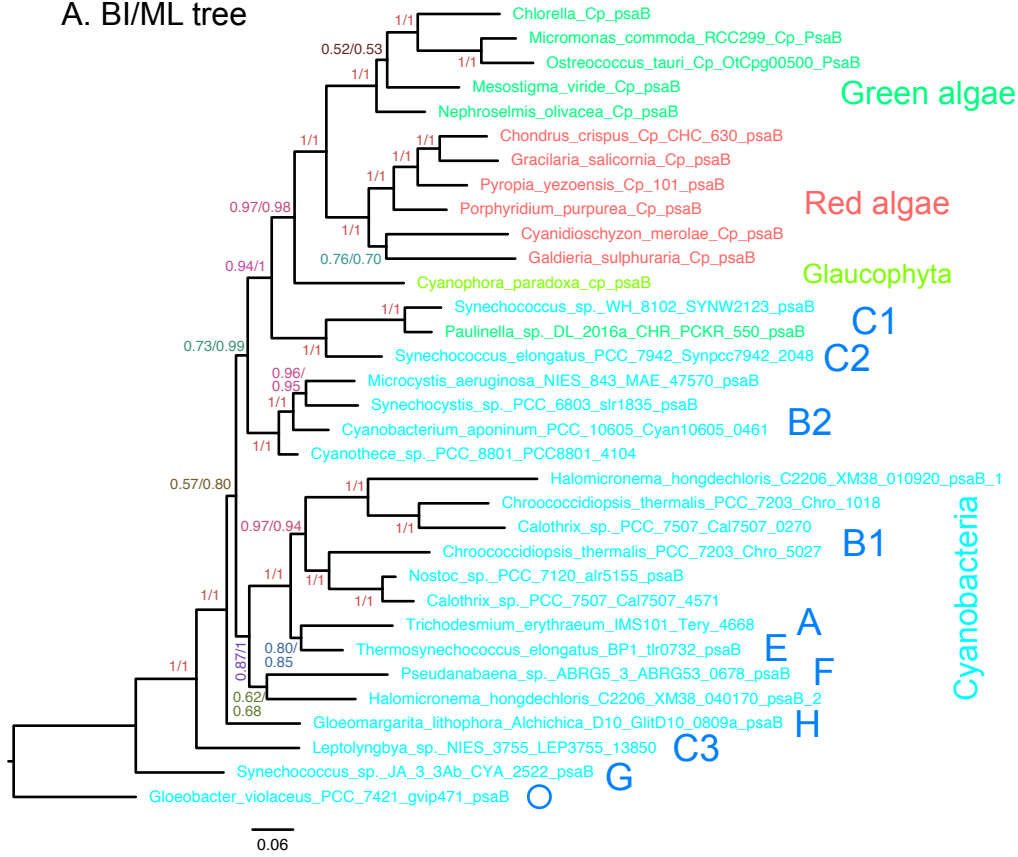

B. PB tree

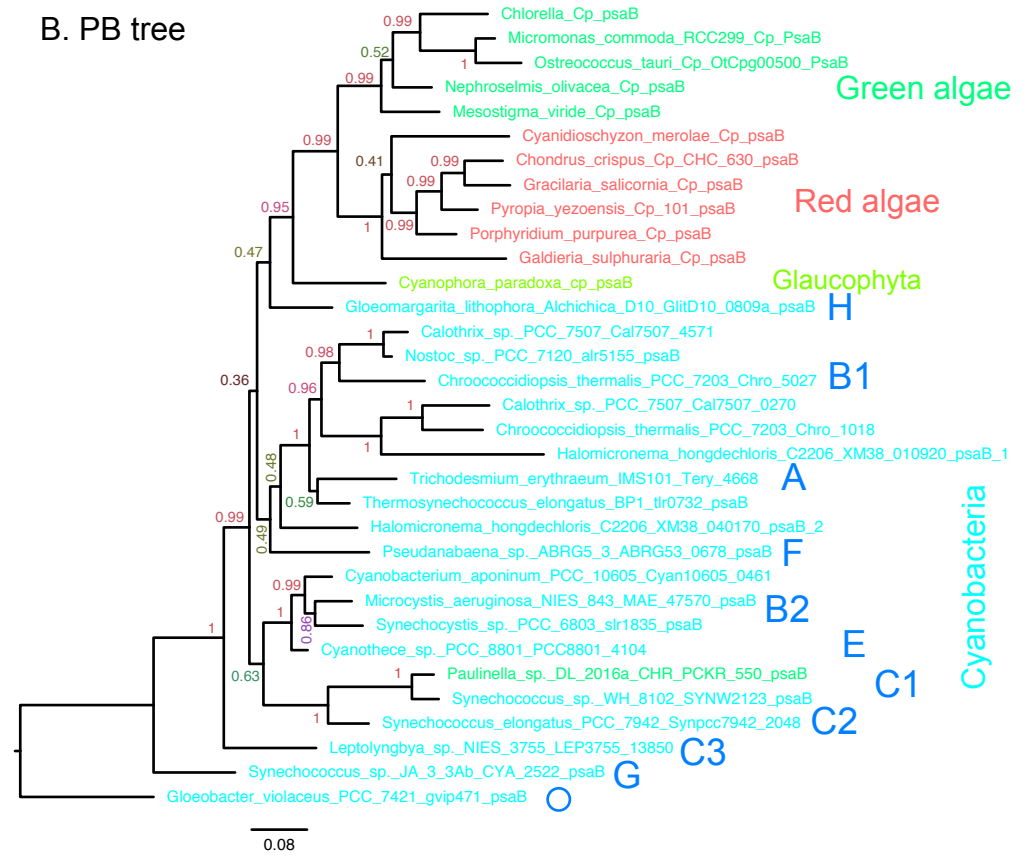



Fig. S4 (Part 2)  
PsaB (set 4e2: 32 taxa)

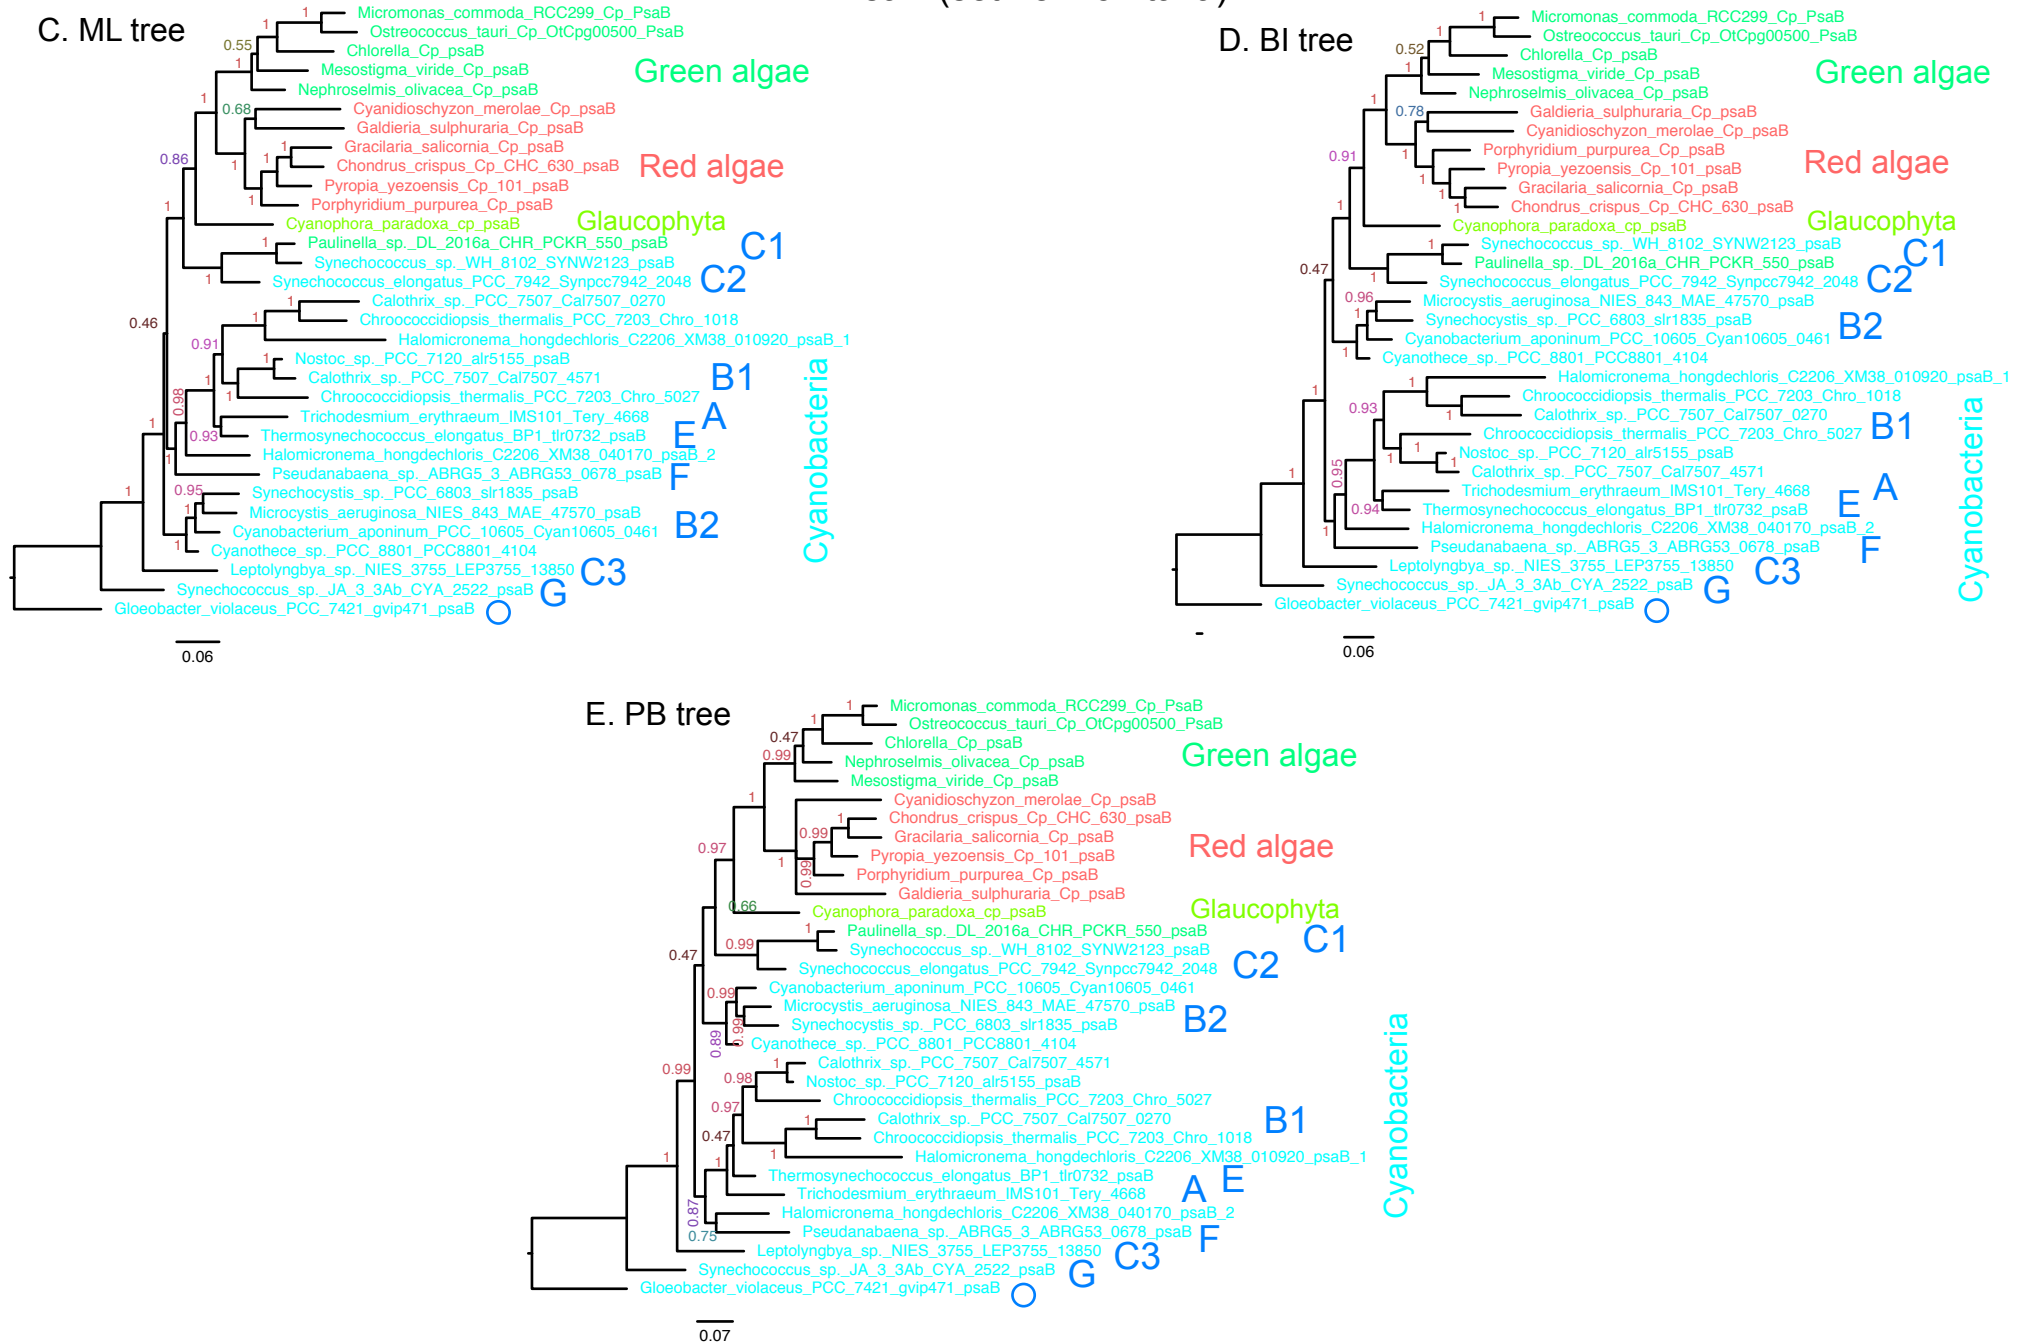

Fig. S5 A

BI tree of Tic20 (70 taxa)

BI/ML (LG)

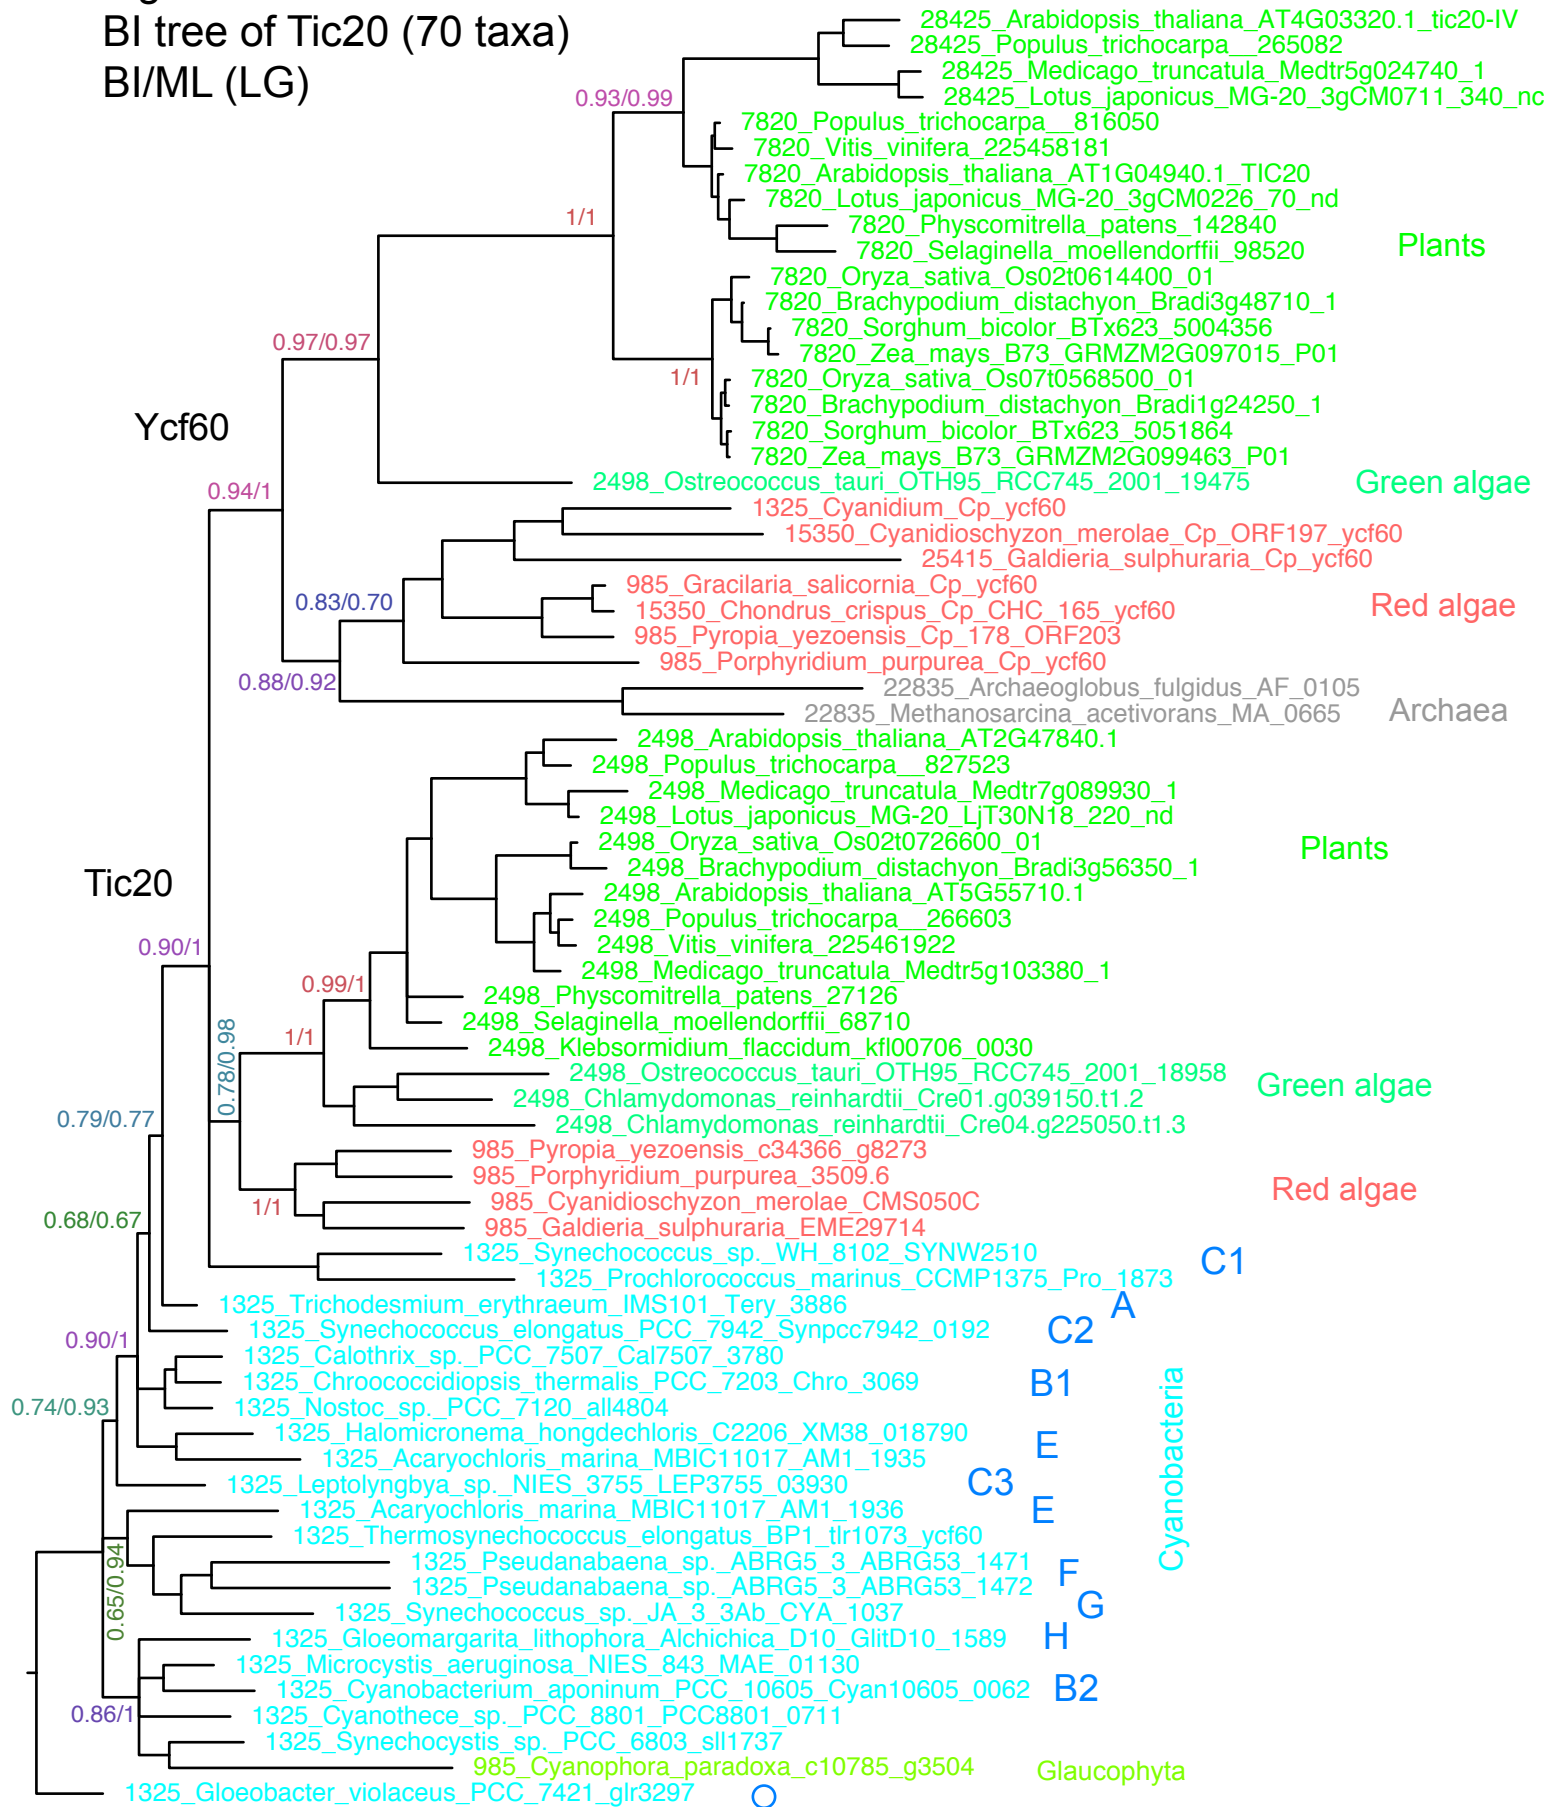

Fig. S5B  
BI tree of Tic20 (41 taxa)  
BI/ML (LG)

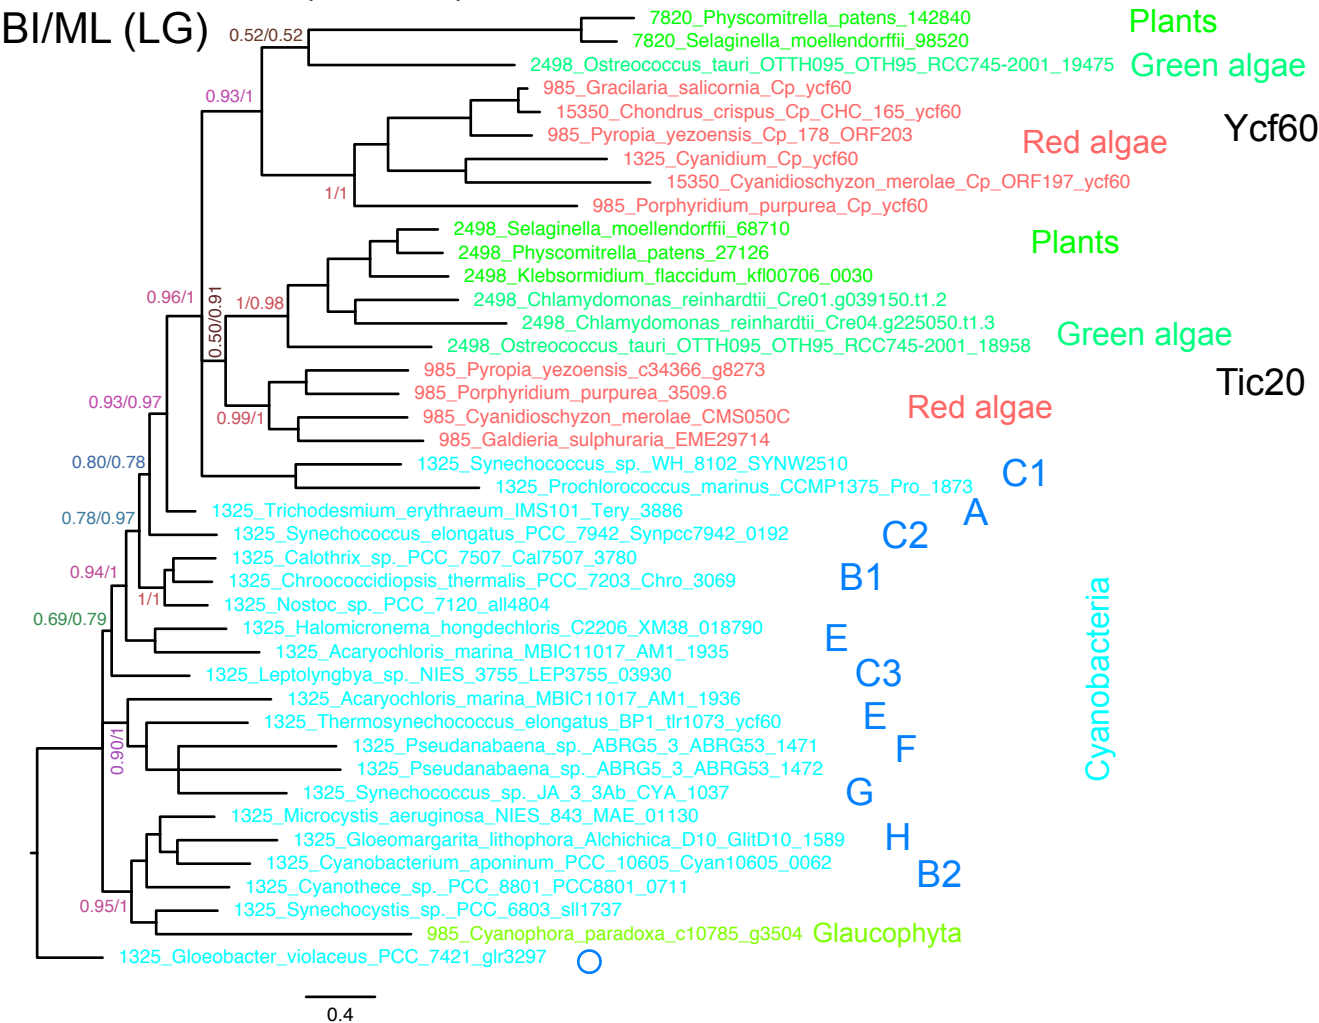

Fig. S5C  
BI tree of Tic20 (32 taxa)  
BI/ML (LG)

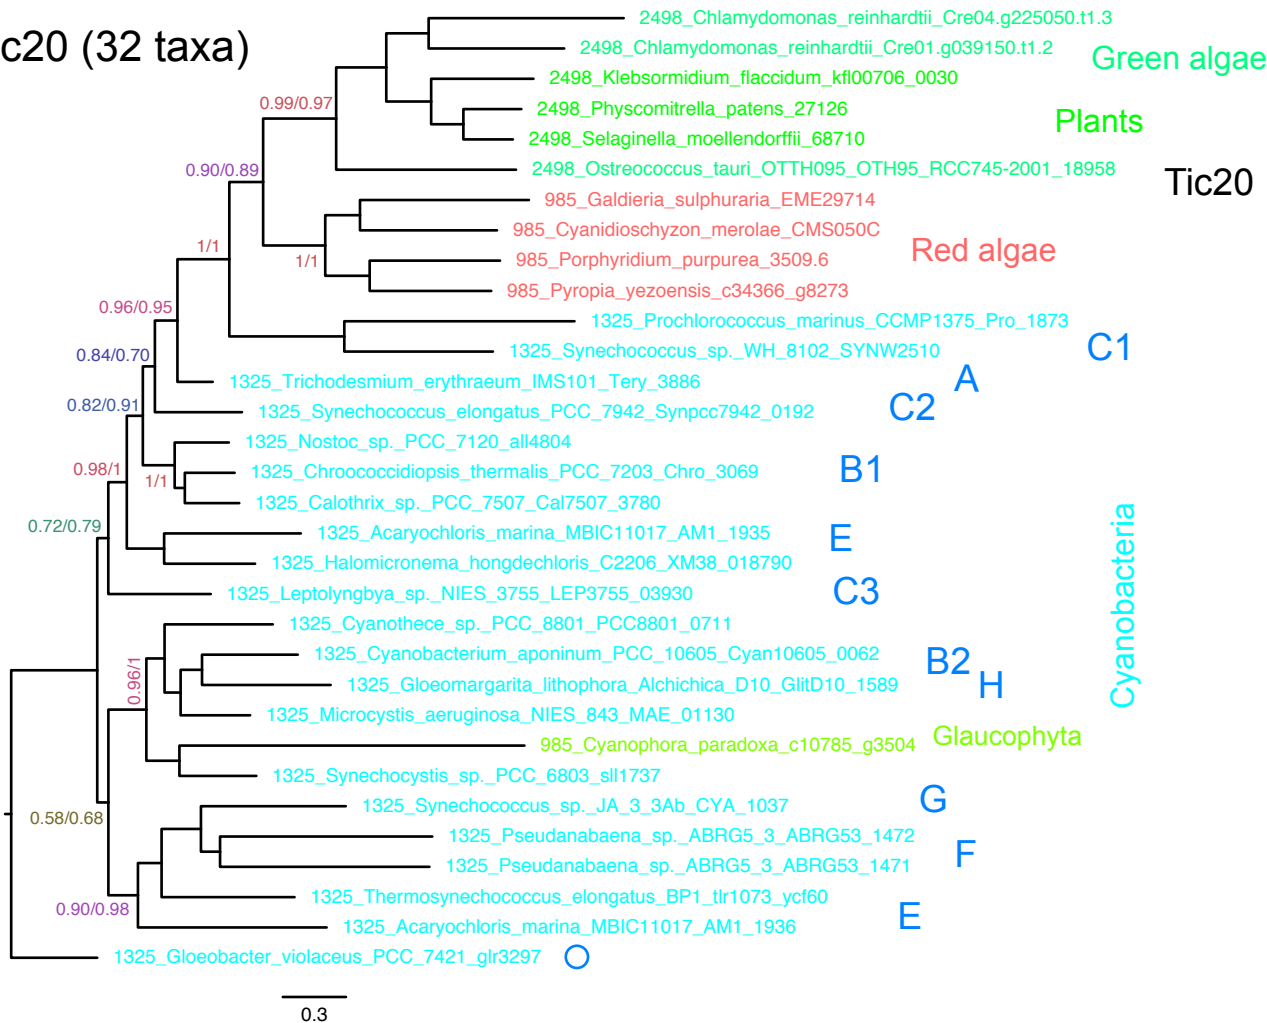

Supplement: s1 [file s1]
